# Supplementary material for: Emergence of Cfr-Mediated Linezolid Resistance among Livestock-Associated Methicillin-Resistant Staphylococcus aureus (LA-MRSA) from Healthy Pigs in Portugal
Source: MDPI journal article supplement (doi:10.3390/antibiotics11101439), 2022-10-19
Supplement: s1 [file s1]

**Table S1** - Antibiotic resistance patterns of MRSA isolates.

| Antibiotic Resistance Patterns                                            | N. of isolates | % MDR isolates |
|---------------------------------------------------------------------------|----------------|----------------|
| FOX, CHL, CIP, CLI, ERY, KAN, PEN, SYN, STR, TET, TMP                     | 1              | 0.6            |
| FOX, CHL, CIP, CLI, ERY, PEN, SYN, TET, TIA                               | 7              | 4.2            |
| FOX, CHL, CIP, CLI, ERY, PEN, SYN, TET, TIA, TMP                          | 1              | 0.6            |
| FOX, CHL, CIP, CLI, ERY, PEN, TET                                         | 1              | 0.6            |
| FOX, CHL, CIP, CLI, PEN, TET, TIA                                         | 7              | 4.2            |
| FOX, CHL, CIP, CLI, PEN, TET, TIA, TMP                                    | 1              | 0.6            |
| FOX, CHL, CIP, PEN, STR, TET                                              | 1              | 0.6            |
| FOX, CHL, CIP, PEN, TET                                                   | 2              | 1.2            |
| FOX, CHL, CLI, ERY, GEN, KAN, PEN, SYN, STR, TET, TIA                     | 1              | 0.6            |
| FOX, CHL, CLI, ERY, GEN, KAN, PEN, SYN, TET, TIA                          | 1              | 0.6            |
| FOX, CHL, CLI, ERY, GEN, KAN, PEN, SYN, TET, TIA, TMP                     | 2              | 1.2            |
| FOX, CHL, CLI, ERY, KAN, PEN, SYN, TET, TIA                               | 1              | 0.6            |
| FOX, CHL, CLI, ERY, LZD, PEN, SYN, TET, TIA, TMP                          | 2              | 1.2            |
| FOX, CHL, CLI, ERY, PEN, SYN, TET, TIA                                    | 4              | 2.4            |
| FOX, CHL, CLI, GEN, KAN, PEN, STR, TET, TIA, TMP                          | 1              | 0.6            |
| FOX, CHL, CLI, LZD, PEN, SYN, TET, TIA                                    | 1              | 0.6            |
| FOX, CHL, CLI, PEN, TET, TIA                                              | 6              | 3.6            |
| FOX, CHL, CLI, PEN, TET, TIA, TMP                                         | 1              | 0.6            |
| FOX, CHL, KAN, PEN, TET, TMP                                              | 2              | 1.2            |
| FOX, CHL, PEN, TET                                                        | 3              | 1.8            |
| FOX, CIP, CLI, ERY, FUS, PEN, TET, TIA, TMP                               | 1              | 0.6            |
| FOX, CIP, CLI, ERY, GEN, KAN, PEN, SYN, TET, TIA, TMP                     | 2              | 1.2            |
| FOX, CIP, CLI, ERY, GEN, KAN, PEN, SYN, TET, TMP                          | 1              | 0.6            |
| FOX, CIP, CLI, ERY, GEN, KAN, PEN, TET, TMP                               | 2              | 1.2            |
| FOX, CIP, CLI, ERY, KAN, PEN, SYN, TET, TIA, TMP                          | 1              | 0.6            |
| FOX, CIP, CLI, ERY, PEN, SYN, STR, TET, TIA                               | 3              | 1.8            |
| FOX, CIP, CLI, ERY, PEN, SYN, TET, TIA                                    | 2              | 1.2            |
| FOX, CIP, CLI, ERY, PEN, SYN, TET, TIA, TMP                               | 7              | 4.2            |
| FOX, CIP, CLI, ERY, PEN, SYN, TET, TMP                                    | 1              | 0.6            |
| FOX, CIP, CLI, KAN, PEN, TET, TIA, TMP                                    | 1              | 0.6            |
| FOX, CIP, CLI, PEN, STR, TET, TIA                                         | 2              | 1.2            |
| FOX, CIP, CLI, PEN, TET, TIA, TMP                                         | 6              | 3.6            |
| FOX, CIP, PEN, STR, TET                                                   | 2              | 1.3            |
| FOX, CIP, PEN, TET                                                        | 1              | 0.6            |
| FOX, CIP, PEN, TET, TMP                                                   | 3              | 1.8            |
| FOX, CLI, ERY, FUS, GEN, KAN, MUP, PEN, SYN, RIF, STR, SMX, TET, TIA, TMP | 1              | 0.6            |
| FOX, CLI, ERY, FUS, GEN, KAN, MUP, PEN, SYN, STR, SMX, TET, TIA           | 1              | 0.6            |
| FOX, CLI, ERY, GEN, KAN, PEN, SYN, TET, TIA, TMP                          | 1              | 0.6            |

|                                             |    |      |
|---------------------------------------------|----|------|
| FOX, CLI, ERY, KAN, PEN, SYN, TET, TIA      | 2  | 1.2  |
| FOX, CLI, ERY, KAN, PEN, SYN, TET, TIA, TMP | 5  | 3.0  |
| FOX, CLI, ERY, PEN, STR, TET                | 2  | 1.2  |
| FOX, CLI, ERY, PEN, SYN, STR, TET, TIA      | 1  | 0.6  |
| FOX, CLI, ERY, PEN, SYN, TET                | 1  | 0.6  |
| FOX, CLI, ERY, PEN, SYN, TET, TIA           | 17 | 10.3 |
| FOX, CLI, ERY, PEN, SYN, TET, TIA, TMP      | 27 | 16.4 |
| FOX, CLI, ERY, PEN, SYN, TET, TMP           | 1  | 0.6  |
| FOX, CLI, ERY, PEN, TET                     | 2  | 1.2  |
| FOX, CLI, ERY, PEN, TET, TMP                | 2  | 1.2  |
| FOX, CLI, GEN, KAN, PEN, TET, TIA, TMP      | 1  | 0.6  |
| FOX, CLI, KAN, PEN, TET, TIA                | 1  | 0.6  |
| FOX, CLI, PEN, SYN, TET, TIA                | 5  | 3.0  |
| FOX, CLI, PEN, SYN, TET, TIA, TMP           | 1  | 0.6  |
| FOX, CLI, PEN, TET, TIA                     | 4  | 2.4  |
| FOX, CLI, PEN, TET, TIA, TMP                | 7  | 4.2  |
| FOX, PEN, TET                               | 4  | *    |
| FOX, PEN, TET, TMP                          | 2  | 1.2  |

\*Not multidrug

FOX, cefoxitin; CLI, clindamycin; PEN, penicillin; KAN, kanamycin; SYN, quinupristin-dalfopristin; TET, tetracycline; TIA, tiamulin; TRI, trimethoprim; STR, streptomycin; ERI, erythromycin; MUP, mupirocin; SMX, sulphamethoxazole; FUS, fusidic acid; GEN, gentamicin; RIF, rifampicin.
